# Supplementary material
Source: MDPI journal article supplement (https://www.mdpi.com/2305-6290/6/3/65)
Supplement: s1 [file s1]

## Supplementary material – “An Evaluation of Ireland’s Sustainable Freight Transport Policy”

### Freight transport measures rating results

**Table S1** Evaluation results of 38 proposed sustainable freight measures (Delphi Round 1 and Round 2 results)

| Freight Measures<br>(Total 38 measures)                | Round 1<br>Mean<br>(*aggregated) | Round 1 SD** | Polarity<br>*** | Round 2 Mean | Round 2 SD | Polarity |
|--------------------------------------------------------|----------------------------------|--------------|-----------------|--------------|------------|----------|
| <i>Road transport measures</i>                         |                                  |              |                 |              |            |          |
| Investment in Intelligent Transportation Systems (ITS) | 1.83                             | 0.46         | None            | 1.95         | 0.81       | None     |
| Modifying the rules for HGV weights and dimensions     | 1.47                             | 1.10         | None            | 1.69         | 1.07       | None     |
| Progressive distance pricing                           | 1.34                             | 0.60         | None            | 1.08         | 0.67       | None     |
| Different pricing with regards to modal shift          | 1.68                             | 0.87         | None            | 1.50         | 0.87       | None     |
| Harmonised speed limits                                | 1.00                             | 0.61         | None            | 1.00         | 0.85       | None     |
| Congestion charge                                      | 1.80                             | 0.89         | None            | 1.60         | 1.14       | None     |
| Enforcement of regulations                             | 1.28                             | 1.13         | None            | 1.23         | 1.04       | None     |
| <i>Supply chain measures</i>                           |                                  |              |                 |              |            |          |
| Training for eco-driving                               | 1.63                             | 0.62         | None            | 1.93         | 0.69       | None     |
| Automated platooning                                   | 1.25                             | 1.35         | Weak            | 0.89         | 1.29       | Weak     |
| Standardised loading units                             | 0.90                             | 0.65         | None            | 1.05         | 0.55       | None     |
| E-freight                                              | 1.03                             | 0.79         | None            | 0.98         | 0.66       | None     |
| Network optimisation – cargo owner                     | 1.08                             | 0.80         | None            | 1.38         | 0.74       | None     |

|                                                     |      |      |      |      |      |        |
|-----------------------------------------------------|------|------|------|------|------|--------|
| Network optimisation – logistics service provider   | 1.63 | 0.85 | None | 1.60 | 0.70 | None   |
| CO2 labels                                          | 0.65 | 0.39 | None | 0.83 | 0.24 | None   |
| Intermodal transport                                | 1.59 | 1.10 | None | 1.69 | 1.00 | None   |
| Transport consolidation and cooperation             | 1.83 | 0.72 | None | 2.03 | 0.64 | None   |
| Transport route planning and control                | 1.63 | 0.58 | None | 1.73 | 0.45 | None   |
| <i>Energy supply measures</i>                       |      |      |      |      |      |        |
| Taxation of fossil fuels                            | 0.83 | 0.99 | None | 0.55 | 1.39 | Weak   |
| Hydrogen infrastructure                             | 0.58 | 1.44 | Weak | 0.64 | 1.84 | Strong |
| Improved batteries                                  | 1.15 | 0.24 | None | 1.20 | 1.21 | Weak   |
| <i>Vehicle supply measures</i>                      |      |      |      |      |      |        |
| Including higher CO2 standards into HGV regulations | 1.38 | 0.46 | None | 1.43 | 1.34 | Weak   |
| BAT vehicle certification for heavy goods vehicles  | 0.95 | 0.51 | None | 0.94 | 1.16 | None   |
| Clean vehicle technologies                          | 1.18 | 0.55 | None | 1.43 | 1.41 | Weak   |
| <i>Urban freight transport measures</i>             |      |      |      |      |      |        |
| Off-street loading bays                             | 1.47 | 0.46 | None | 1.47 | 0.68 | None   |
| Cargo bikes                                         | 2.28 | 0.85 | None | 2.15 | 0.99 | None   |
| Mobile depots                                       | 1.63 | 0.85 | None | 1.78 | 0.79 | None   |
| Urban distribution/consolidation centres            | 1.50 | 0.68 | None | 1.40 | 0.76 | None   |
| Off-peak deliveries                                 | 2.03 | 0.58 | None | 1.93 | 0.82 | None   |
| Spatial planning for logistics                      | 1.80 | 0.57 | None | 1.75 | 0.75 | None   |

|                                                        |      |      |      |      |      |      |
|--------------------------------------------------------|------|------|------|------|------|------|
| Freight routes, delivery, and servicing plans          | 1.38 | 0.90 | None | 1.48 | 1.04 | None |
| By boat logistics                                      | 1.30 | 1.14 | None | 1.38 | 1.31 | Weak |
| <b><i>Rail and Maritime transport measures</i></b>     |      |      |      |      |      |      |
| Investment in rail infrastructure                      | 1.80 | 1.01 | None | 1.75 | 0.98 | None |
| Rail Freight prioritisation                            | 1.75 | 1.09 | None | 1.80 | 1.03 | None |
| Electrification of rail corridors                      | 2.05 | 0.83 | None | 2.25 | 0.49 | None |
| Longer or/and heavier trains                           | 1.63 | 0.82 | None | 1.68 | 0.83 | None |
| Investment in inland waterway transport infrastructure | 1.05 | 1.16 | None | 1.20 | 1.27 | Weak |
| Investment in maritime port infrastructure             | 1.73 | 0.65 | None | 1.60 | 1.17 | None |
| Develop new technologies in inland waterways           | 1.20 | 1.16 | None | 1.30 | 1.18 | None |
| <b><i>Waterborne transport measures</i></b>            |      |      |      |      |      |      |
| Investment in inland waterway transport infrastructure | 1.05 | 1.16 | None | 1.20 | 1.27 | Weak |
| Investment in maritime port infrastructure             | 1.73 | 0.65 | None | 1.60 | 1.17 | None |
| Develop new technologies in inland waterways           | 1.20 | 1.16 | None | 1.30 | 1.18 | None |

Note:

\*A higher mean rating score implies a stronger potential positive impact on sustainability, where '3' = strong positive impact; '-3' = strong negative impact.;

\*\*A higher standard deviation (SD) value implies a wider divergence of opinion among panel members.

\*\*\* Based on policy Delphi analysis guidelines by De Loë (1995), 'polarity' measures whether the panel's ratings were polarised. Polarity is determined using the variance of the distribution. Categories include strong ( $SD \geq 1.5$ ), weak ( $1.2 \leq SD < 1.5$ ), none ( $SD < 1.2$ ).
